# Supplementary material for: The NLR Protein Encoded by the Resistance Gene Ty-2 Is Triggered by the Replication-Associated Protein Rep/C1 of Tomato Yellow Leaf Curl Virus
Source: Front Plant Sci. 2020 Sep 10;11:545306. doi: 10.3389/fpls.2020.545306 (PMC7511541; doi:10.3389/fpls.2020.545306)
Supplement: Supplementary Table S3 — Recombinant screening of crosses between Ty-2 introgression line and susceptible S. habrochaites accessions using flanking markers 51342_MH and AWC2At4g32930. [file Table_3.xlsx]

## Sheet: Supplementary Table S3
Supplementary Table S3 Recombinant screening of crosses between Ty-2 introgression line and susceptible S. habrochaites accessions using flanking markers 51342_MH and C2At4g32930
Generation	Susceptible S. habrochaites parent	No. of families	Total number of plants	No. of recombinants	Marker genotype/physical position (Mbp)a		No. of plants
					51342_MH	AWC2At4g32930
					54.26	54.6
BC1	G1.1290	2	110	4	B	B	82
					H	H	24
					B	H	3
					H	B	1
	G1.1257	5	225	17	B	B	145
					H	H	63
					B	H	13
					H	B	4
	G1.1560	3	80	1	B	B	36
					H	H	43
					B	H	1
Pseudo F2	G1.1257	1	88	10	B	B	28
					H	H	40
					A	A	10
					B	H	3
					H	B	2
					H	A	5
a A, homozygous for susceptible parent S. habrochaites allele; B, homozygous for S. habrochaites Ty-2 allele; H, heterozygous
Physical positions of the markers are based on the tomato Heinz genome version SL2.50 chromosome 11
