# Supplementary material for: The NLR Protein Encoded by the Resistance Gene Ty-2 Is Triggered by the Replication-Associated Protein Rep/C1 of Tomato Yellow Leaf Curl Virus
Source: Front Plant Sci. 2020 Sep 10;11:545306. doi: 10.3389/fpls.2020.545306 (PMC7511541; doi:10.3389/fpls.2020.545306)
Supplement: Supplementary Table S6 — Primers used for genome walking or long-range PCR to close the gaps between Ty-2 BAC7 and BAC6, and between BAC6 and BAC1. [file Table_6.xlsx]

## Sheet: Supplementary Table S6
Supplementary Table S6 Primers used for genome walking or long-range PCR to close the gaps between Ty-2 BAC7 and BAC6, and between BAC6 and BAC1
Primer name	Sequence (5'-3')	Size PCR product
GWAW910up	GGAAGTTGACAAAATGGACCTAAAGAA		gap 1 Genome Walking
nGWAW910up	GCTCCTGAGGTGGTAACAAACTATTTC
AWbpR8	CATTCTTACGCTTCCGAAACAT	4004 bp
nGW6AM13	TAGAGAAGTTGAAGGACACATTGCTTG
GW6AM13	ATATTCTCATTGATAGGCTTGCTCCTG
TMA168F	AGAGTGAACGATTTCACCTTTACC	1577 bp	gap 2 (long-range) PCR
TMA168R	GACGTCCCTCTAACTCATTCCTTA
TMA192	TAAGAAAAGTCATACGAAAAGGAAAAA	995 bp
AWGAP200	TGCCCTCATTATTGCTAAATTACA
AWGAP202	TACATAAAATATCGGGGTAAGA	883 bp
AWGAP203	TGTACTAAAAAGATCTAAGAGGGA
AWGAP201	GAGTACTAAATTAGGTACGTGCAATAA	856 bp
TMA197	TTACAAGTCCAATCCAACAAATG
TMA198	TTTTGATACATTTGTTGGATTGGACTT	1154 bp
TMA193	GACAAAGCTATTAAATCTCACAGGT
TMA172a	CAAAATARTATACGTAGGAGGCAGTT	1800 bp
TMA173	AATTTCCCGTCTTTTCTTTCTGTT
TMA114	AATGGAAGAACAATAACCTAAAAGCACA	2402 bp
TMA163R	AACAGAGGTACTCGACGAAAGTTTTT
TMA167F	GGTGAAGAAATCGAGAGAAATTGT	1477 bp
TMA167R	CAAATTAATATGGTCACCCACAGA
TMA187	CAGTCCTAATAATGATTGCGTCAC	1273 bp
TMA188	ACAATTTCTCTCGATTTCTTCACC
TMA214	TTCGTAAACAAAGTGGATTC		gap 2 sequencing
TMA215	TTCGTGGCTACGATTTACATAGA
TMA216	CGTGTCTCGTGGACATTTGA
TMA217	TTGTTCGTCGAGCTTCATTTT
TMA218	AAGGCATGAGGTTTTCGTTG
TMA219	TGAATTGTGGTACGAGAAAGTTAA
TMA220	CAAAGGCATGAGGTTTTCGT
TMA221	CCTTTCACTTTGCTTCCAATG
TMA222	TTGTGCAAGATTCAAACTACATGA
